# Supplementary material for: Impact of fat types on the visual, textural, and sensory properties of Nanberenji (a traditional gluten-free cookie)
Source: publisher site journal article supplement (doi:10.1515/ijfe-2023-0013), 2023-08-15
Supplement: Supplementary file 1 [file j_ijfe-2023-0013_suppl_001.docx]

**Research highlights**

1. NG samples showed lower cracking (%) in compared with NOO and NBF samples.
2. Image textural features of NOO were different from NG and NBF samples.
3. Nanberenji prepared with olive oil showed an acceptable sensory characteristic.
4. Different image processing concepts depicted good correlation with physical changes of cookies.
